# Supplementary material
Source: publisher figshare collection journal article supplement (https://acs.figshare.com/ndownloader/files/3944308)
Supplement: Supplementary file 1 [file 3944308]

## Supporting Information

### Physicochemical Investigation of the Panchromatic Effect on $\beta$ -Substituted $\text{Zn}^{\text{II}}$ Porphyrinates for DSSCs: The Role of the $\pi$ Bridge between a Dithienylethylene Unit and the Porphyrinic Ring.

Gabriele di Carlo, Alessio Orbelli Biroli, Francesca Tessore, Maddalena Pizzotti, Patrizia Romana Mussini, Anna Amat, Filippo De Angelis, Alessandro Abboto, Vanira Trifiletti, Riccardo Ruffo

#### Syntheses

**[2-((4-((E)-2-(5-((E)-2-(3,4-dihexylthiophen-2-yl)vinyl)-3,4-dihexylthiophen-2-yl)vinyl)phenyl)ethynyl)-5,10,15,20-tetrakis(3,5-di-tert-butylphenyl)porphyrinate] $\text{Zn}^{\text{II}}$  (5)**

Aldehyde **4** (80 mg,  $6.4 \cdot 10^{-2}$  mmol) and phosphonate **16** (52 mg,  $7.6 \cdot 10^{-2}$  mmol) were introduced under nitrogen in 2.6 mL of dry and deaerated THF in a Schlenk tube. Then tBuOK (19 mg,  $16.9 \cdot 10^{-2}$  mmol) is added portionwise and the reaction mixture was allowed to react at room temperature for 3 hours. The organic phase was reduced under vacuum; the mixture was extracted with  $\text{CH}_2\text{Cl}_2$ , washed with acidulated water and dried over  $\text{Na}_2\text{SO}_4$ . After solvent removal the crude obtained is purified by column chromatography (silica gel, Hexane/AcOEt 96:4) leading to **6** as purple powder (99.2 mg, 87% yield).

$^1\text{H}$ -NMR (400 MHz,  $\text{CDCl}_3$ ,  $25^\circ\text{C}$ ):  $\delta$  = 9.33 (d, 1H), 9.03-8.96 (m, 5H), 8.77-8.75 (m, 1H), 8.12 (m, 8H), 7.85 (s, 1H), 7.81 (s, 3H), 7.45-7.41 (m, 2H), 7.33-7.30 (m, 2H), 7.07-7.01 (m, 2H), 6.92 (d, 1H,  $J_{\text{trans}} = 15.7$  Hz), 6.91 (d, 1H,  $J_{\text{trans}} = 15.7$  Hz), 6.81 (s, 1H), 2.72-2.63 (m, 6H), 2.57-2.51 (m, 2H), 1.58-1.48 (m, 72H), 1.42-1.38 (m, 38H), 0.99-0.95 ppm (m, 12H).

**[2-((4-((E)-2-(5-((E)-2-(5-formyl-3,4-dihexylthiophen-2-yl)vinyl)-3,4-dihexylthiophen-2-yl)vinyl)phenyl)ethynyl)-5,10,15,20-tetrakis(3,5-di-tert-butylphenyl)porphyrinate] $\text{Zn}^{\text{II}}$  (6)**

Compound **5** (99.2 mg,  $5.6 \cdot 10^{-2}$  mmol), dissolved in dry DCE (370  $\mu$ L) and anhydrous DMF (8.6  $\mu$ L,  $11.2 \cdot 10^{-2}$  mmol) were introduced under nitrogen atmosphere in a Schlenk tube. POCl<sub>3</sub> (6.3  $\mu$ L,  $6.7 \cdot 10^{-2}$  mmol) is added dropwise at 0°C, then the mixture was refluxed for 18 h. After cooling to room temperature, 256  $\mu$ L of an aqueous solution of NaOH (1.25 M) was added dropwise and the mixture was vigorously stirred for 2 h. The solution was finally extracted with CH<sub>2</sub>Cl<sub>2</sub> and the organic phase dried over Na<sub>2</sub>SO<sub>4</sub>. Removal of the solvent and column chromatography (silica gel, Hexane/ CH<sub>2</sub>Cl<sub>2</sub> 1:1) gave aldehyde **10** as purple powder (58.8 mg, 58% yield).

<sup>1</sup>H-NMR (400 MHz, CDCl<sub>3</sub>, 25°C):  $\delta$  = 10.04 (s, 1H), 9.19 (s, 1H), 8.97-8.86 (m, 5H), 8.75-8.73 (m, 1H), 8.16-8.11 (m, 8H), 7.87-7.83 (m, 4H), 7.46-7.43 (m, 2H), 7.35-7.31 (m, 4H), 7.05 (d, 1H,  $J_{\text{trans}}$  = 15.6 Hz), 6.97 (d, 1H,  $J_{\text{trans}}$  = 15.6 Hz), 2.57-2.51 (m, 2H), 2.72-2.63 (m, 6H), 1.59-1.50 (m, 72H), 1.44-1.39 (m, 38H), 1.02-0.95 ppm (m, 12H).

**[2-((4-((E)-2-(5-((E)-2-(5-((E)-2-carboxy-2-cyanovinyl)-3,4-dihexylthiophen-2-yl)vinyl)-3,4-dihexylthiophen-2-yl)vinyl)phenyl)ethynyl)-5,10,15,20-tetrakis(3,5-di-tert-butylphenyl)porphyrinate]Zn<sup>II</sup> (Dye 1)**

In Schlenk tube cyanoacetic acid (8.3 mg,  $9.7 \cdot 10^{-2}$  mmol), dissolved in 1 mL of CH<sub>3</sub>CN, and 10  $\mu$ L of piperidine were added under nitrogen atmosphere over a stirred solution of aldehyde **6** (58.8 mg,  $3.2 \cdot 10^{-2}$  mmol) in 2 mL CHCl<sub>3</sub>, thus the mixture was refluxed overnight. Afterwards, the solvent was evaporated under reduced pressure, the crude was taken up with CH<sub>2</sub>Cl<sub>2</sub> and washed with water. Finally the organic phase was dried with Na<sub>2</sub>SO<sub>4</sub> and the product was purified by column chromatography (silica gel, CH<sub>2</sub>Cl<sub>2</sub>/CH<sub>3</sub>OH 95/5), obtaining pure **1** as a purple powder (39 mg, 65% yield).

<sup>1</sup>H-NMR (400 MHz, CDCl<sub>3</sub>, 25°C):  $\delta$  = 9.19 (s, 1H), 8.97-8.86 (m, 5H), 8.75-8.73 (m, 1H), 8.40 (s, 1H), 8.16-8.11 (m, 8H), 7.87-7.83 (m, 4H), 7.45 (d, 2H,  $J$  = 8.3 Hz), 7.33 (d, 2H,  $J$  = 8.3 Hz), 7.32 (d, 1H,  $J_{\text{trans}}$  = 15.4 Hz), 7.25 (d, 1H,  $J_{\text{trans}}$  = 15.4 Hz), 7.10 (d, 1H,  $J_{\text{trans}}$  = 15.4 Hz), 6.96 (d, 1H,  $J_{\text{trans}}$  = 15.4 Hz), 3.24 (m, 2H), 2.71-2.67 (m, 4H), 1.93 (m, 2H), 1.62-1.30 (m, 110H), 1.02-0.94 ppm (m,

12H). MS-FAB(+)  $m/z$ : 1875  $[M+H]^+$ ; elemental analysis calcd (%) for Chemical Formula:  $C_{124}H_{153}N_5O_2S_2Zn$ : C 79.43, H 8.22, N 3.73; found C 79.74, H 8.20, N 3.74

**[2-ethynyl-5,10,15,20-tetrakis(3,5-di-*tert*-butylphenyl)porphyrinate]Zn(II) (8)**

The compound **8** was synthesized by enhanced microwave Sonogashira coupling starting from [2-Bromo-5,10,15,20-tetrakis(3,5-di-*tert*-butylphenyl) porphyrinate] Zn(II), proceeding as reported in our previous work.<sup>8</sup>

$Pd(PPh_3)_4$  (11.2 mg,  $1.0 \cdot 10^{-2}$  mmol), **7** (117.1 mg,  $9.7 \cdot 10^{-2}$  mmol), freshly distilled  $NEt_2H$  (12mL), anhydrous DMF (4mL) and ethynyltrihexylsilane (299 mg,  $9.7 \cdot 10^{-1}$  mmol) were introduced in a dry Schlenk tube and degassed with four freeze-pump-thaw cycles at  $-78^\circ C$ . The mixture was then transferred under nitrogen flow in a microwave quartz vessel, and CuI (2.8 mg,  $1.5 \cdot 10^{-2}$  mmol) was added. The mixture was allowed to react in the microwave cavity at  $120^\circ C$  for 1 hr, then the solvent was evaporated *in vacuo*. The crude was purified by flash chromatography (hexane/THF 98:2), leading to [2-ethynyl(trihexyl)silane-5,10,15,20-tetrakis(3,5-di-*tert*-butylphenyl)porphyrinate]Zn(II) as a purple solid (86.3 mg, 62% yield). The ethynyl terminal group was finally deprotected by treatment with Tetra-*n*-butylammonium fluoride (TBAF) in THF, as reported in literature,<sup>18</sup> and the pure compound **8** (48.5 mg, 70% yield) was obtained by flash chromatography (hexane/ $CH_2Cl_2$  8:2).

$^1H$ -NMR (400 MHz,  $CDCl_3$ ,  $25^\circ C$ ):  $\delta$  = 9.19 (s, 1H), 8.94-8.82 (m, 7H), 8.06 (s, 4H), 8.01 (s, 2H), 7.91 (s, 2H), 7.80 (s, 1H), 7.77 (s, 3H), 3.17 (s, 1H), 1.54 (s, 36H), 1.52 (s, 18H), 1.50 ppm (s, 18H).

**[(*E*)-2-((5-(2-(5-formyl-3,4-dihexylthiophen-2-yl)vinyl)-3,4-dihexylthiophen-2-yl)ethynyl)-5,10,15,20-tetrakis(3,5-di-*tert*-butylphenyl)porphyrinate]Zn<sup>II</sup> (9)**

The intermediate **8** (48.5 mg,  $4.2 \cdot 10^{-2}$  mmol), dissolved in freshly distilled  $NEt_3$  (1.5 mL) and anhydrous THF (1.5 mL), was introduced in a dry Schlenk tube.  $PdCl_2(PPh_3)_2$  (4.4 mg,  $0.6 \cdot 10^{-2}$

mmol) and iodide intermediate **14** (60 mg,  $8.4 \cdot 10^{-2}$  mmol) were added and the mixture degassed with four freeze-pump-thaw cycles at  $-78^{\circ}\text{C}$ . Finally, CuI (1.2 mg,  $0.4 \cdot 10^{-2}$  mmol) was added and the mixture was refluxed for 18 hr. The solvent was evaporated *in vacuo* and the crude was purified by column chromatography (silica gel, hexane/AcOEt = 98/2), leading to coupling product **9** as a purple powder (45 mg, 63% yield).

$^1\text{H}$ -NMR (400 MHz,  $\text{CDCl}_3$ ,  $25^{\circ}\text{C}$ ):  $\delta$  = 9.72 (s, 1H), 9.25 (s, 1H), 9.03 (d, 4H), 8.99 (d, 1H), 8.84 (d, 1H), 8.16-8.11 (m, 8H), 7.92 (s, 1H), 7.87-7.84 (m, 3H), 7.33 (d, 1H,  $J_{\text{trans}} = 15.5$  Hz), 7.08 (d, 1H,  $J_{\text{trans}} = 15.5$  Hz), 2.89 (t, 2H), 2.75 (m, 4H), 2.66 (t, 2H), 1.59-1.55 (m, 72H), 1.43-1.40 (m, 38H), 1.06-0.93 ppm (m, 12H).

**[(*E*)-2-((5-(2-(5-((*E*)-2-carboxy-2-cyanovinyl)-3,4-dihexylthiophen-2-yl)vinyl)-3,4-dihexylthiophen-2-yl)ethynyl)-5,10,15,20-tetrakis(3,5-di-*tert*-butylphenyl)porphyrinate] $\text{Zn}^{\text{II}}$**   
**(Dye 2)**

In Schlenk tube cyanoacetic acid (6.7 mg,  $7.9 \cdot 10^{-2}$  mmol), dissolved in 1 mL of  $\text{CH}_3\text{CN}$ , and 10  $\mu\text{L}$  of piperidine were added under nitrogen atmosphere over a stirred solution of aldehyde **9** (45 mg,  $2.6 \cdot 10^{-2}$  mmol) in 2 mL  $\text{CHCl}_3$ , thus the mixture was refluxed overnight. Afterwards, the solvent was evaporated under reduced pressure, the crude was taken up with  $\text{CH}_2\text{Cl}_2$  and washed with water. Finally the organic phase was dried with  $\text{Na}_2\text{SO}_4$  and the product was purified by column chromatography (silica gel,  $\text{CH}_2\text{Cl}_2/\text{CH}_3\text{OH}$  95/5), obtaining pure **2** as a purple powder (28 mg, 61% yield).

$^1\text{H}$ -NMR (400 MHz,  $\text{CDCl}_3$ ,  $25^{\circ}\text{C}$ ):  $\delta$  = 9.21 (s, 1H), 9.99 (d, 4H), 8.93 (d, 1H), 8.80 (d, 1H), 8.85 (s, 1H), 8.09-8.01 (m, 8H), 7.88 (s, 1H), 7.80-7.77 (m, 3H), 7.30 (d, 1H,  $J_{\text{trans}} = 15.3$  Hz), 7.11 (d, 1H,  $J_{\text{trans}} = 15.3$  Hz), 2.87-2.67 (m, 8H), 1.62-1.28 (m, 110H), 0.95-0.88 ppm (m, 12H). MS-FAB(+)  $m/z$ : 1772  $[\text{M}+\text{H}]^+$ ; elemental analysis calcd (%) for Chemical Formula:  $\text{C}_{116}\text{H}_{147}\text{N}_5\text{O}_2\text{S}_2\text{Zn}$ : C 78.58, H 8.36, N 3.95; found C 78.87, H 8.34, N 3.96

**[2-((*E*)-2-(5-((*E*)-2-(3,4-dihexylthiophen-2-yl)vinyl)-3,4-dihexylthiophen-2-yl)vinyl)-5,10,15,20-tetrakis(3,5-di-*tert*-butylphenyl)porphyrinate]Zn<sup>II</sup> (**11**)**

2-formyl-porphyrin **10** (60 mg,  $5.2 \cdot 10^{-2}$  mmol) and phosphonate **16** (42 mg,  $6.2 \cdot 10^{-2}$  mmol) were introduced under nitrogen in 2.5 mL of dry and deaerated THF in a Schlenk tube. Then tBuOK (15 mg,  $13.5 \cdot 10^{-2}$  mmol) is added portionwise and the reaction mixture was allowed to react at room temperature for 2 hours. The organic phase was reduced under vacuum; the mixture was extracted with CH<sub>2</sub>Cl<sub>2</sub>, washed with acidulated water and dried over Na<sub>2</sub>SO<sub>4</sub>. After solvent removal the crude obtained is purified by column chromatography (silica gel, Hexane/CH<sub>2</sub>Cl<sub>2</sub> 8:2) leading to **11** as purple powder (78 mg, 90% yield).

<sup>1</sup>H-NMR (400 MHz, CDCl<sub>3</sub>, 25°C):  $\delta$  = 9.09-9.01 (m, 6H), 8.96 (d, 1H), 8.20 (s, 2H), 8.16 (s, 4H), 8.07 (s, 2H), 7.91 (s, 1H), 7.85 (s, 3H), 7.39 (d, 1H,  $J_{\text{trans}} = 15.3$  Hz), 7.14 (d, 1H,  $J_{\text{trans}} = 15.5$  Hz), 7.05 (d, 1H,  $J_{\text{trans}} = 15.5$  Hz), 6.86 (s, 1H), 6.58 (d, 1H,  $J_{\text{trans}} = 15.3$  Hz), 2.81-2.76 (m, 2H), 2.81-2.76 (m, 2H), 2.68-2.64 (m, 4H), 2.62-2.58 (m, 2H), 1.62-1.52 (m, 72H), 1.44-1.42 (m, 38H), 0.99-0.95 ppm (m, 12H).

**[2-((*E*)-2-(5-((*E*)-2-(5-formyl-3,4-dihexylthiophen-2-yl)vinyl)-3,4-dihexylthiophen-2-yl)vinyl)-5,10,15,20-tetrakis(3,5-di-*tert*-butylphenyl)porphyrinate]Zn<sup>II</sup> (**12**)**

Intermediate **11** (78 mg,  $4.6 \cdot 10^{-2}$  mmol), dissolved in dry DCE (307  $\mu$ L) and anhydrous DMF (7.1  $\mu$ L,  $6.7 \cdot 10^{-2}$  mmol) were introduced under nitrogen atmosphere in a Schlenk tube. POCl<sub>3</sub> (5.2  $\mu$ L,  $5.6 \cdot 10^{-2}$  mmol) is added dropwise at 0°C, then the mixture was refluxed for 18 h. After cooling to room temperature, 206  $\mu$ L of an aqueous solution of NaOH (1.25 M) was added dropwise and the mixture was vigorously stirred for 2 h. The solution was finally extracted with CH<sub>2</sub>Cl<sub>2</sub> and the organic phase dried over Na<sub>2</sub>SO<sub>4</sub>. Removal of the solvent and column chromatography (silica gel, Hexane/ CH<sub>2</sub>Cl<sub>2</sub> 7:3) gave aldehyde **12** as purple powder (46 mg, 60% yield).

<sup>1</sup>H-NMR (400 MHz, CDCl<sub>3</sub>, 25°C):  $\delta$  = 10.07 (s, 1H), 8.98 (s, 1H), 8.93 (d, 4H), 8.90 (d, 1H), 8.85 (d, 1H), 8.19 (s, 2H), 8.14 (m, 4H), 8.06 (s, 2H), 7.88 (s, 1H), 7.88 (s, 1H), 7.85 (s, 1H), 7.84 (s,

2H), 7.40 (d, 2H,  $J_{\text{trans}} = 15.4$  Hz), 6.99 (d, 1H,  $J_{\text{trans}} = 15.4$  Hz), 6.60 (d, 1H,  $J_{\text{trans}} = 15.4$  Hz), 2.93 (t, 2H), 2.93 (t, 2H), 2.76 (t, 2H), 2.67 (m, 4H), 1.60-1.34 (m, 110H), 0.99-0.91 ppm (m, 12H).

**[2-((*E*)-2-(5-((*E*)-2-(5-((*E*)-2-carboxy-2-cyanovinyl)-3,4-dihexylthiophen-2-yl)vinyl)-3,4-dihexylthiophen-2-yl)vinyl)-5,10,15,20-tetrakis(3,5-di-*tert*-butylphenyl)porphyrinate] $\text{Zn}^{\text{II}}$**   
**(Dye 3)**

In Schlenk tube cyanoacetic acid (4.6 mg,  $5.4 \cdot 10^{-2}$  mmol), dissolved in 1 mL of  $\text{CH}_3\text{CN}$ , and 10  $\mu\text{L}$  of piperidine were added under nitrogen atmosphere over a stirred solution of aldehyde **12** (46 mg,  $2.7 \cdot 10^{-2}$  mmol) in 3 mL  $\text{CHCl}_3$ , thus the mixture was refluxed overnight. Afterwards, the solvent was evaporated under reduced pressure, the crude was taken up with  $\text{CH}_2\text{Cl}_2$  and washed with water. Finally the organic phase was dried with  $\text{Na}_2\text{SO}_4$  and the product was purified by column chromatography (silica gel,  $\text{CH}_2\text{Cl}_2/\text{CH}_3\text{OH}$  95/5), obtaining pure **3** as a purple powder (37 mg, 77% yield).

$^1\text{H-NMR}$  (400 MHz,  $\text{CDCl}_3$ ,  $25^\circ\text{C}$ ):  $\delta = 9.06$  (s, 1H), 9.01 (d, 4H), 8.97 (d, 1H), 8.91 (d, 1H), 8.45 (s, 1H), 8.16 (s, 2H), 8.11 (m, 4H), 8.03 (s, 2H), 7.84 (s, 1H), 7.80 (s, 3H), 7.34 (d, 2H,  $J_{\text{trans}} = 15.4$  Hz), 7.00 (d, 1H,  $J_{\text{trans}} = 15.4$  Hz), 6.61 (d, 1H,  $J_{\text{trans}} = 15.4$  Hz), 2.73-2.63 (m, 8H), 1.63-1.47 (m, 72H), 1.36-1.29 (m, 38H), 0.96-0.88 ppm (m, 12H). MS-FAB(+)  $m/z$ : 1774  $[\text{M}+\text{H}]^+$ ; elemental analysis calcd (%) for Chemical Formula:  $\text{C}_{116}\text{H}_{149}\text{N}_5\text{O}_2\text{S}_2\text{Zn}$ : C 78.49, H 8.46, N 3.95; found C 78.77, H 8.49, N 3.97

**(*E*)-5-(2-(3,4-dihexyl-5-iodothiophen-2-yl)vinyl)-3,4-dihexylthiophene-2-carbaldehyde (**14**)**

The aldehyde **13** (100 mg,  $1.8 \cdot 10^{-2}$  mmol) dissolved in 4 mL of  $\text{CHCl}_3$  was introduced in a dry Schlenk tube under nitrogen atmosphere. A solution of N-Iodosuccinimide (45 mg,  $2.0 \cdot 10^{-2}$  mmol) dissolved in acetic acid (2 mL) was added dropwisely at  $0^\circ\text{C}$ . After that the mixture was stirred overnight at room temperature and concentrated, and the residue was diluted with  $\text{CH}_2\text{Cl}_2$  (10 mL). The organic phase was washed with water, neutralized with  $\text{K}_2\text{CO}_3$ , dried over  $\text{Na}_2\text{SO}_4$  and

evaporated to dryness. The residue was purified by chromatography on silica gel (eluent: CH<sub>2</sub>Cl<sub>2</sub>/hexane) leading to **14** as a yellow powder (120 mg, 98% yield).

<sup>1</sup>H-NMR (400 MHz, CDCl<sub>3</sub>, 25°C): δ = 9.99 (s, 1H, CHO), 7.20 (d, 1H, J<sub>trans</sub> = 15.6 Hz ), 6.89 (d, 1H, J<sub>trans</sub> = 15.6 Hz), 2.86 (m, 2H), 2.67-2.58 (m, 4H), 2.51 (m, 2H), 1.62-1.28 (m, 32H), 0.93-0.90 ppm (m, 12H).

1s) Lee, C.-W.; Lu, C.-W.; Lan, C.-M.; Huang, Y.-L.; Liang, Y.-R.; Yen, W.-N.; Liu, Y.-C.; Lin, Y.-S.; Diau, E. W.-G; Yeh, C.-Y. Novel Zinc Porphyrin Sensitizers for Dye-Sensitized Solar Cells: Synthesis and Spectral, Electrochemical, and Photovoltaic Properties. *Chemistry – A European Journal* **2009**, *15*, 1403-1412.

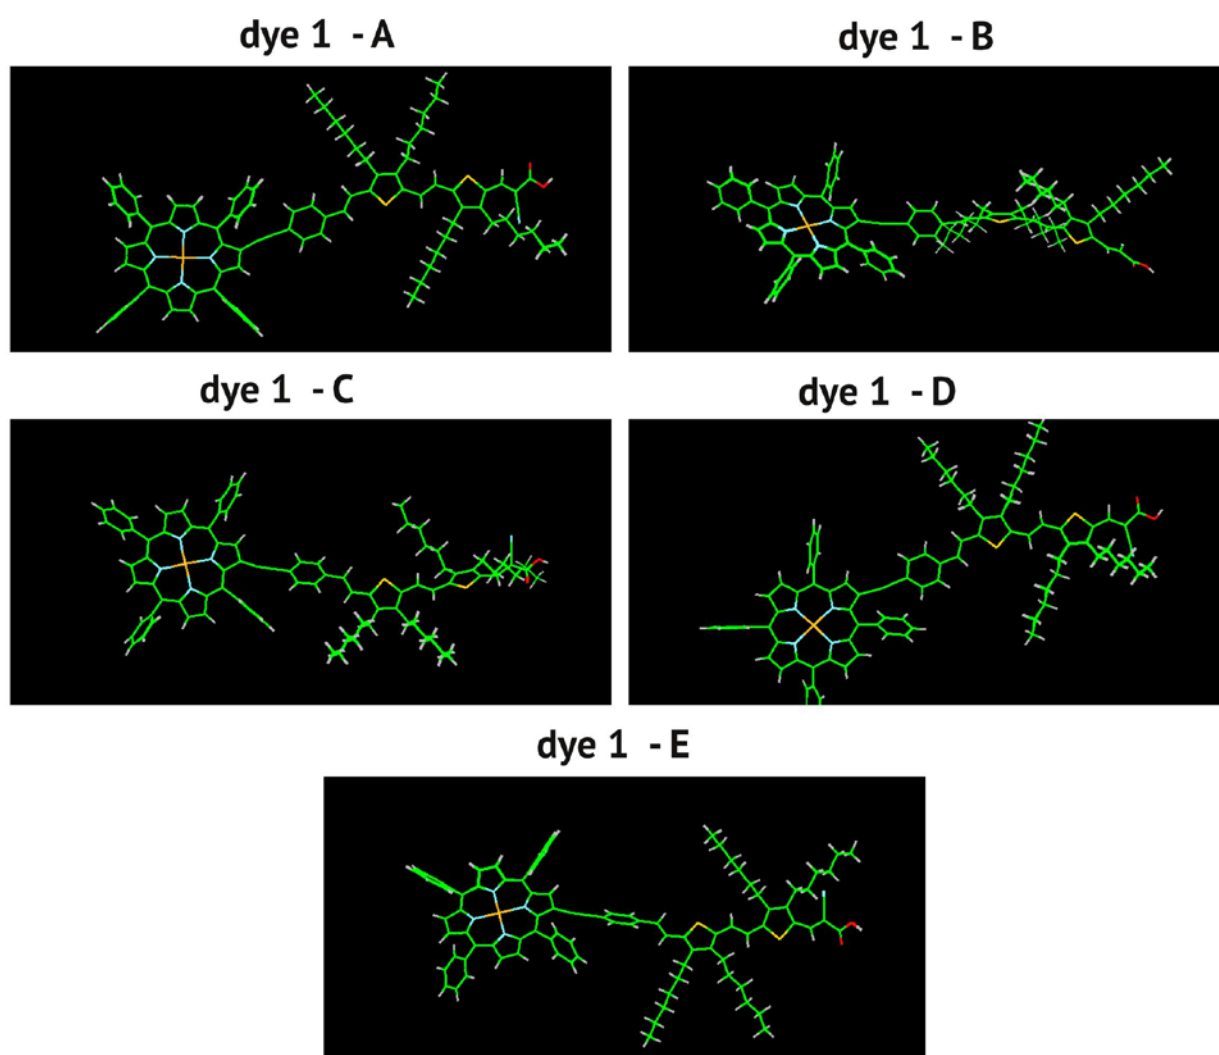

**Figure 1S.** Studied conformers for dye **1**.

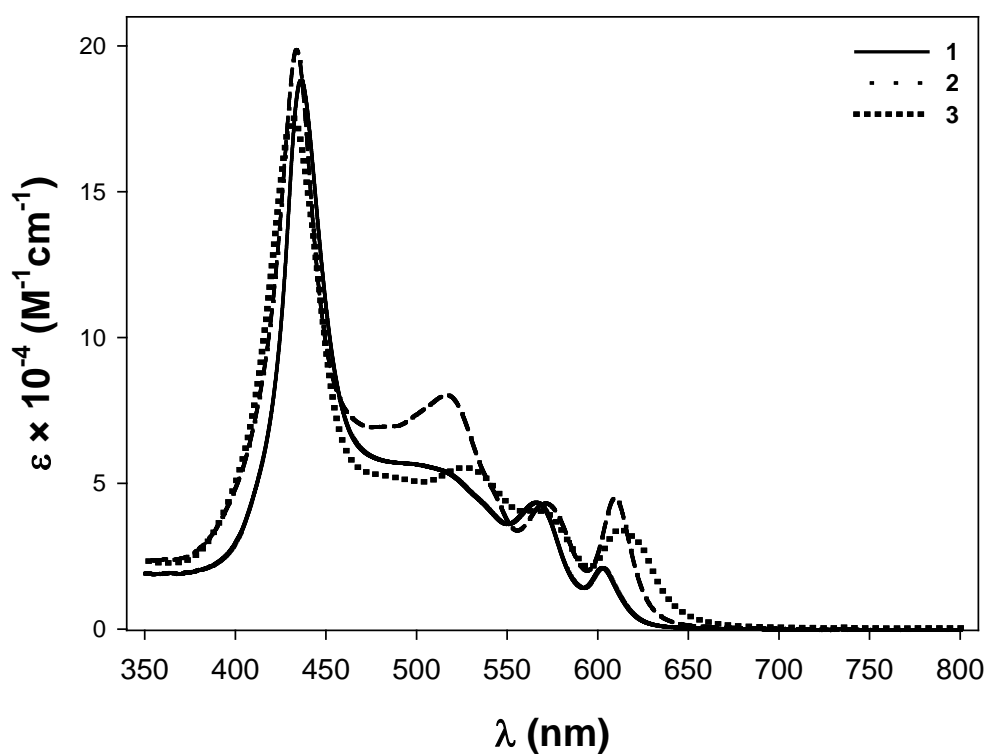

**Figure 2S.** Electronic absorption spectra in THF solution of **1-3**.

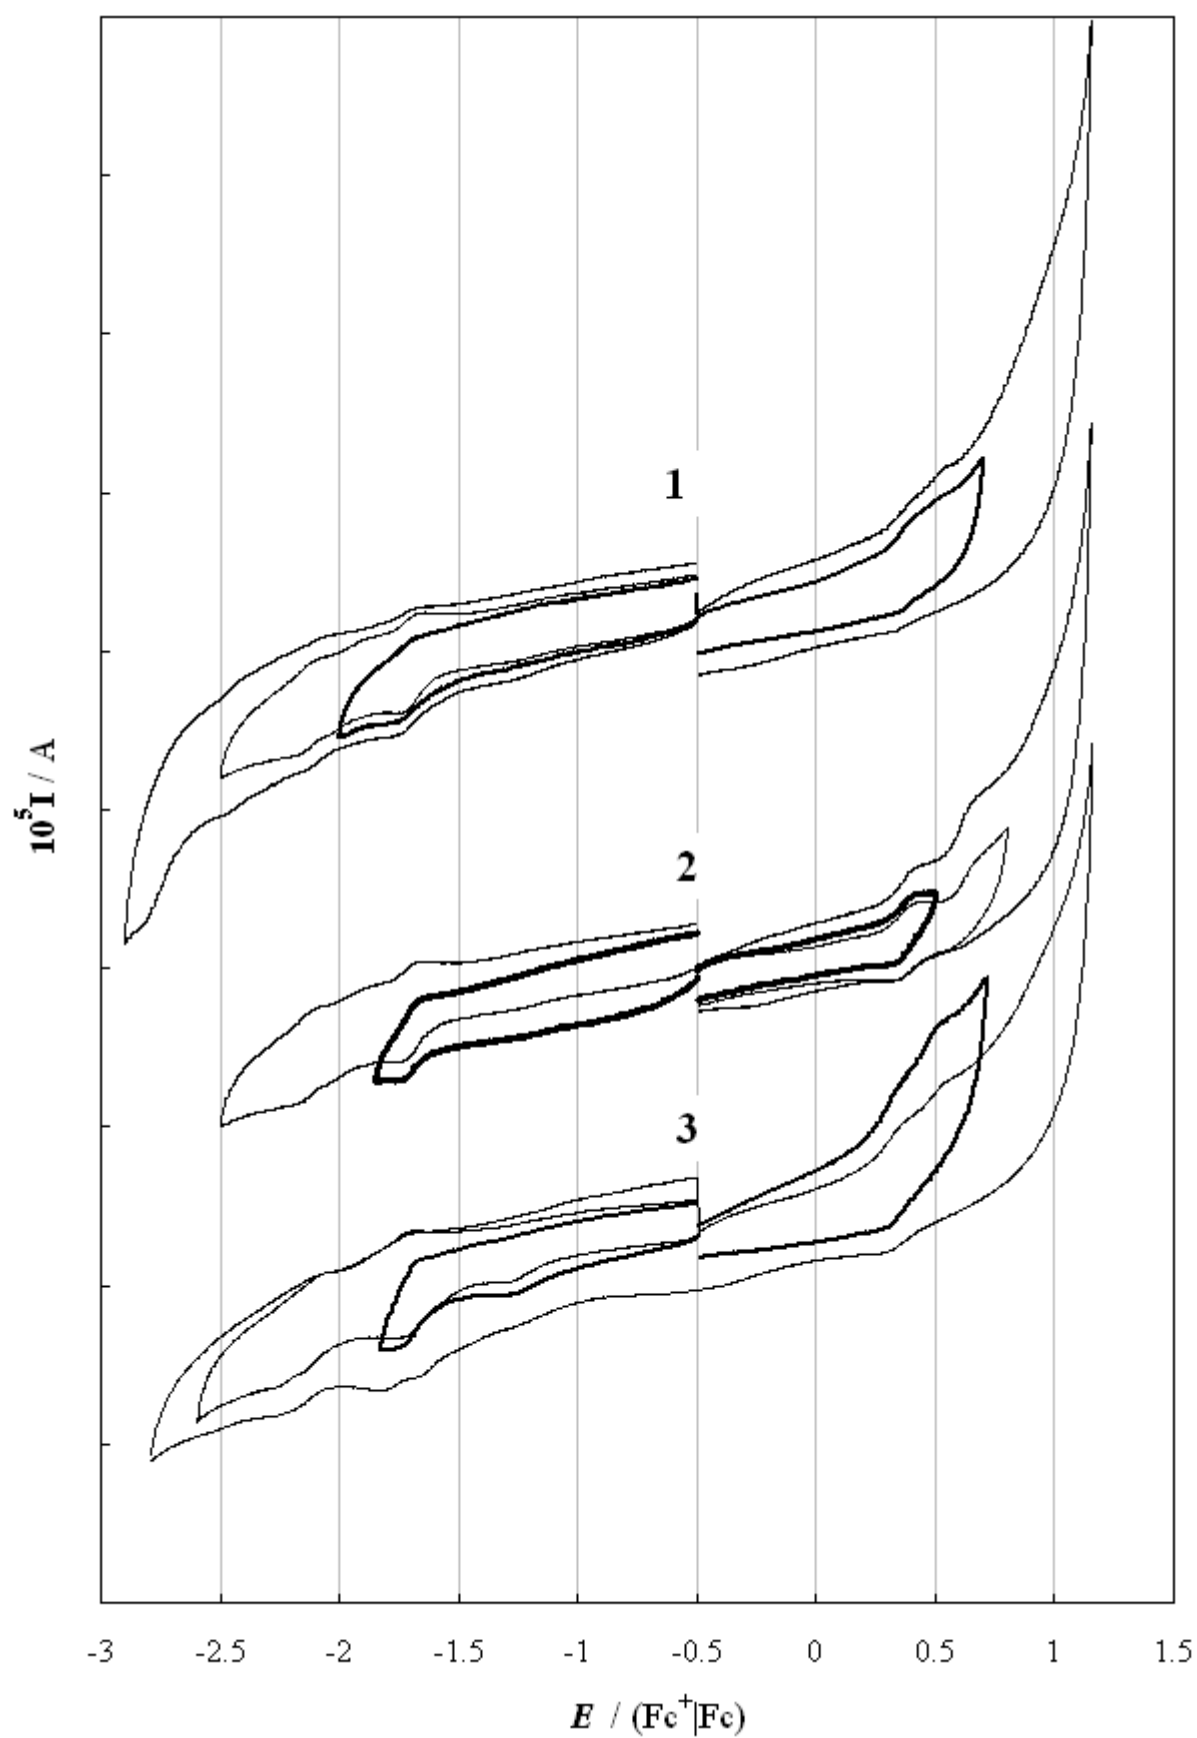

**Figure 3S.** CV features of porphyrinates **1–3** in DMF + 0.1 M TBAP, at  $0.2 \text{ V s}^{-1}$  scan rate, with ohmic drop compensation.

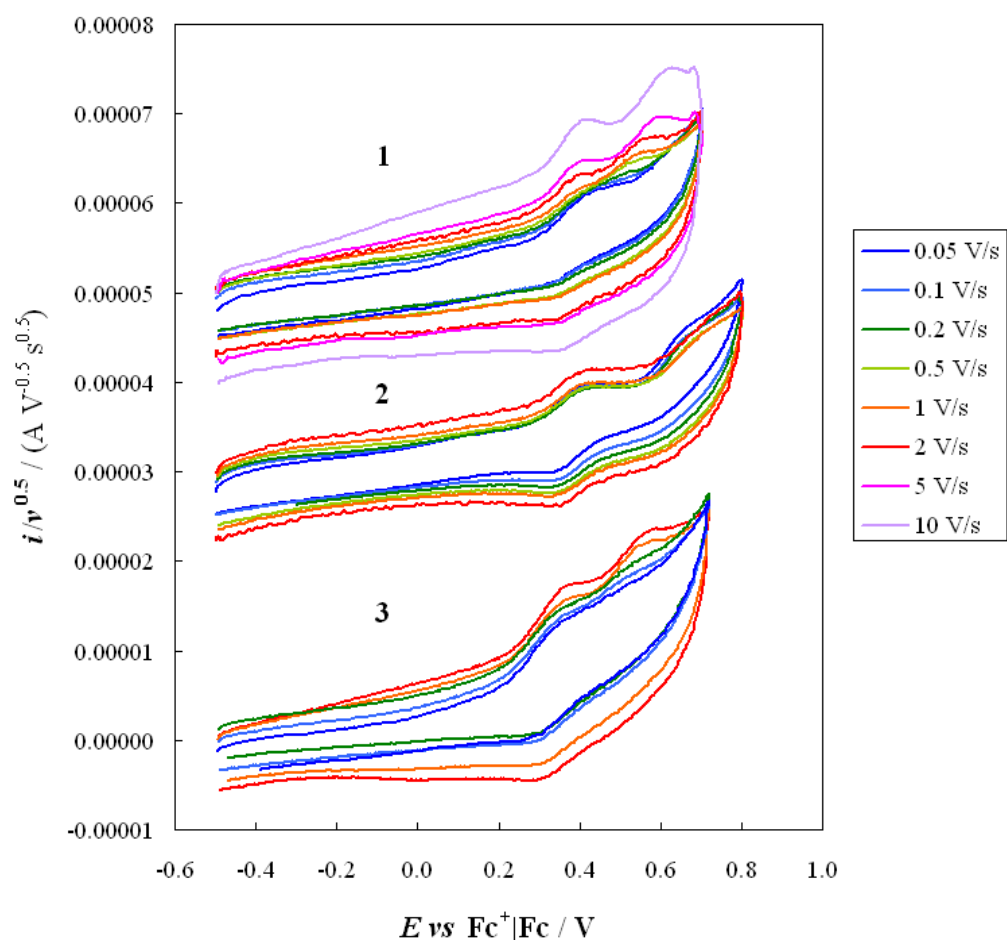

**Figure 4S.** Scan rate effect on the first oxidation peaks of the investigated molecules, recorded with ohmic drop correction and normalized with respect to  $v^{0.5}$ .

**Table 1S. Experimental and Computed Electronic Absorption Spectra in THF Solution of the Zn<sup>II</sup>-Porphyrinates 1-3. Comparison between B3LYP and CAM-B3LYP.**

| Dye      | B bands                            |            | Comp. B bands                   |  | Sharp bands                        |                          | Comp. Sh. bands                 |  | Q bands                            |                          | Comp. Q bands                   |  |
|----------|------------------------------------|------------|---------------------------------|--|------------------------------------|--------------------------|---------------------------------|--|------------------------------------|--------------------------|---------------------------------|--|
|          | $\lambda_a$ (nm) [log $\epsilon$ ] |            | $\lambda_a$ (nm) [Int. (a. u.)] |  | $\lambda_a$ (nm) [log $\epsilon$ ] |                          | $\lambda_a$ (nm) [Int. (a. u.)] |  | $\lambda_a$ (nm) [log $\epsilon$ ] |                          | $\lambda_a$ (nm) [Int. (a. u.)] |  |
|          | Exp.                               | B3LYP      | CAM-B3LYP                       |  | Exp.                               | B3LYP                    | CAM-B3LYP                       |  | Exp.                               | B3LYP                    | CAM-B3LYP                       |  |
| <b>1</b> | 436 [5.27]                         | 447 [1.21] | 418[1.34]<br>394[1.51]          |  | 493 [4.74]                         | 498 [0.15]<br>524 [0.21] | 492 [3.25]<br>--                |  | 566 [4.67]<br>603 [4.36]           | 545 [0.14]<br>630 [2.51] | --<br>571 [0.19]                |  |
| <b>2</b> | 434 [5.30]                         | 425 [1.26] | 401[1.13]<br>394[0.86]          |  | 511[4.92]                          | 520 [0.23]               | 457 [2.91]                      |  | 571 [4.66]<br>609 [4.67]           | 549 [0.33]<br>600 [1.34] | 572 [0.17]                      |  |
| <b>3</b> | 432 [5.24]                         | 424 [1.22] | 410[0.88]<br>397[1.35]          |  | 527 [4.75]                         | 521 [0.10]               | 492 [2.54]                      |  | 566 [4.62]<br>612 [4.55]           | 556 [0.22]<br>630 [1.72] | 573 [0.20]                      |  |
